# Supplementary material
Source: PubMed Central journal article supplement (PMC1201589)
Supplement: pnas_0504053102_1.pdf [file pnas_0504053102_1.pdf]

## Supporting Text

### A. Stability Analysis of System 2

In this *Appendix*, we study the stability of the equilibria of system **2**. If we redefine the system as  $(0,0)^T$  when  $V^+ = V^- = 0$ , then there are at most three equilibria:

$$E_0 = (0,0), E_F = (\kappa_F \beta_-, 0),$$

$$E^* = \left( \frac{\gamma \kappa_F}{\gamma + \sigma} \left( \beta_- + \sigma - \frac{\tau \sigma}{\gamma + \sigma} \right), \frac{\sigma \kappa_F}{\gamma + \sigma} \left( \beta_- + \sigma - \frac{\tau \sigma}{\gamma + \sigma} \right) \right),$$

where  $E^*$  exists if  $\sigma > 0$ . To determine the properties of these three equilibria and the topological structures, set  $x = V^- + V^+$ ,  $y = V^+$ . Recall  $\sigma = \tau - \gamma + \beta_+ - \beta_-$ , we have

$$\begin{cases} \frac{dx}{dt} = \beta_- x + (\beta_+ - \beta_-) y - \frac{x^2}{\kappa_F}, \\ \frac{dy}{dt} = \left( \beta_+ + \sigma - \frac{\tau y}{x} - \frac{x}{\kappa_F} \right) y. \end{cases} \quad [\mathbf{A1}]$$

Notice that  $E_0 = (0,0)$ ,  $E_F = (\kappa_F \beta_-, 0)$  are still equilibria of system **A1**, and the third equilibrium  $E^*$  becomes

$$\bar{E}^* = (\bar{x}, \bar{y}) = \left( \kappa_F \left( \beta_- + \sigma - \frac{\tau \sigma}{\gamma + \sigma} \right), \frac{\sigma \kappa_F}{\gamma + \sigma} \left( \beta_- + \sigma - \frac{\tau \sigma}{\gamma + \sigma} \right) \right).$$

We first discuss the stability of  $E_F$  and  $E^*$ .

**Proposition A1.** The semitrivial equilibrium  $E_F = (\kappa_F \beta_-, 0)$  is stable if  $\sigma < 0$  and unstable if  $\sigma > 0$ .

*Proof.* The variational matrix of system **A1** at  $E_F$  takes the form

$$J_K = \begin{pmatrix} -\beta_- & \beta_+ - \beta_- \\ 0 & \sigma \end{pmatrix}.$$

The eigenvalues are  $\lambda_1 = -\beta_- < 0$  and  $\lambda_2 = \sigma$ . Thus,  $E_F$  is stable if  $\sigma < 0$  and unstable if  $\sigma > 0$ .

**Proposition A2.** The positive equilibrium  $\bar{E}^* = (\bar{x}, \bar{y})$  is locally asymptotically stable if  $\sigma > 0$ .

*Proof.* The variational matrix of system **A1** at  $\bar{E}^*$  takes the form

$$\bar{J} = \begin{pmatrix} \beta_- - \frac{2\bar{x}}{K_F} & \beta_+ - \beta_- \\ \frac{\tau \bar{y}}{\bar{x}} - \frac{\bar{y}}{K_F} & -\frac{\tau \bar{y}}{\bar{x}} \end{pmatrix}.$$

We then have

$$\begin{aligned}
\det(\bar{J}) &= -\frac{\bar{\tau y}}{x} \left( \beta_- - \frac{2\bar{x}}{K_F} \right) - (\beta_+ - \beta_-) \left( \frac{\bar{\tau y}^2}{x^2} - \frac{\bar{y}}{K_F} \right) \\
&= -\frac{\tau \beta_- \bar{y}}{x} + \frac{2\bar{\tau y}}{K_F} - (\beta_+ - \beta_-) \left( \frac{\bar{\tau y}^2}{x^2} - \frac{\bar{y}}{K_F} \right) \\
&= -\frac{\tau \sigma \beta_-}{\gamma + \sigma} + \frac{2\tau \sigma}{\gamma + \sigma} \left( \beta_- + \sigma - \frac{\tau \sigma}{\gamma + \sigma} \right) - (\beta_+ - \beta_-) \left[ \frac{\tau \sigma^2}{(\gamma + \sigma)^2} - \frac{\sigma}{\gamma + \sigma} \left( \beta_- + \sigma - \frac{\tau \sigma}{\gamma + \sigma} \right) \right] \\
&= \frac{\tau \sigma}{\gamma + \sigma} \left( \beta_- + 2\sigma - \frac{2\tau \sigma}{\gamma + \sigma} \right) + (\beta_+ - \beta_-) \frac{\sigma}{\gamma + \sigma} \left( \beta_- + \sigma - \frac{2\tau \sigma}{\gamma + \sigma} \right) \\
&= \frac{\tau \sigma}{\gamma + \sigma} \left( \beta_- + 2\sigma - \frac{2\tau \sigma}{\gamma + \sigma} \right) + (\gamma + \sigma - \tau) \frac{\sigma}{\gamma + \sigma} \left( \beta_- + \sigma - \frac{2\tau \sigma}{\gamma + \sigma} \right) \\
&= \frac{\tau \sigma}{\gamma + \sigma} \left( \beta_- + 2\sigma - \frac{2\tau \sigma}{\gamma + \sigma} \right) + \sigma \left( \beta_- + \sigma - \frac{2\tau \sigma}{\gamma + \sigma} \right) - \frac{\tau \sigma}{\gamma + \sigma} \left( \beta_- + \sigma - \frac{2\tau \sigma}{\gamma + \sigma} \right) \\
&= \frac{\tau \sigma^2}{\gamma + \sigma} + \sigma \left( \beta_- + \sigma - \frac{2\tau \sigma}{\gamma + \sigma} \right) \\
&= \sigma \left( \beta_- + \sigma - \frac{\tau \sigma}{\gamma + \sigma} \right) > 0
\end{aligned}$$

and

$$\begin{aligned}
tr(\bar{J}) &= -\frac{\bar{\tau y}}{x} - \frac{2\bar{x}}{K_F} + \beta_+ = -\frac{\tau \sigma}{\gamma + \sigma} - 2 \left( \beta_- + \sigma - \frac{\tau \sigma}{\gamma + \sigma} \right) + \beta_- \\
&= - \left( \beta_- + \sigma - \frac{\tau \sigma}{\gamma + \sigma} \right) - \sigma < 0.
\end{aligned}$$

Therefore,  $\bar{E}^*$  is locally asymptotically stable.

$E_0 = (0,0)$  is a degenerate equilibrium of system **A1**. To determine its property, rescale the age variable by  $da = xdt$ , system **A1** becomes

$$\begin{cases} \frac{dx}{dt} = (\beta_+ - \beta_-)xy + \beta_-x^2 - \frac{x^3}{\kappa_F} = X_2(x, y) + \phi(x, y), \\ \frac{dy}{dt} = (\beta_+ + \sigma)xy - \tau y^2 - \frac{x^2y}{\kappa_F} = Y_2(x, y) + \psi(x, y), \end{cases} \quad [\mathbf{A2}]$$

where  $X_2(x, y)$  and  $Y_2(x, y)$  are homogeneous polynomials in  $x$  and  $y$  of degree 2,  $\phi(x, y)$  and  $\psi(x, y)$  are polynomials in  $x$  and  $y$  of higher degrees.

Let  $x = r \cos \theta$ ,  $y = r \sin \theta$ ,  $0 \leq \theta \leq \pi/2$ . Define

$$G(\theta) = \cos \theta \cdot Y_2(\cos \theta, \sin \theta) - \sin \theta \cdot X_2(\cos \theta, \sin \theta).$$

The characteristic equation is as follows:

$$G(\theta) = r^2 \cos \theta \sin \theta \left[ (\sigma + \beta_+ - \beta_-) \cos \theta - \frac{\sigma + \beta_+ - \beta_-}{\gamma + \sigma} \sin \theta \right] = 0. \quad [\mathbf{A3}]$$

We can see that either  $G(\theta) = 0$  has a finite number of real roots  $\theta_k$  ( $k = 1, 2, \dots, n$ ) or  $G(\theta) \equiv 0$ . By the results in Zhang *et al.* (1), no orbit of system **A2** can tend to  $(0, 0)$  spirally. If  $G(\theta) \equiv 0$ , then it is singular. If  $G(\theta)$  is not identically zero, there are at most  $2(2 + 1) = 5$  directions  $\theta = \theta_i$  along which an orbit of system **A2** may approach the origin; these directions  $\theta = \theta_i$  are given by solutions of the characteristic Eq. **A3**. If the orbit of system **A1** tends to the origin as a sequence,  $\{t_n\}$  tends to  $+\infty$  or  $-\infty$  along a direction  $\theta = \theta_i$ , then the direction is called a *characteristic direction*. The orbits of system **A2**, which approach the origin along characteristic directions, divide a neighborhood of the origin into a finite number of open regions, called sectors. For an analytic system, there are three types of sectors: hyperbolic, parabolic, and elliptic [see Perko (2)].

Solving for  $\theta$  in Eq. **A3** for  $0 \leq \theta \leq \pi/2$ , we obtain three simple roots:

$$\theta_1 = 0, \theta_2 = \pi/2, \theta_3 = \arctan \frac{\sigma + \beta_+ - \beta_-}{\gamma + \sigma}.$$

**Proposition A3.** There exist  $\varepsilon_1 > 0$  and  $r_1 > 0$  such that there is a unique orbit of system **A2** in  $\{(r, \theta) : 0 < r < r_1, 0 \leq \theta - \theta_3 < \varepsilon_1\}$  that tends to the trivial equilibrium  $E_0 = (0,0)$  along  $\theta = \theta_3$  as  $t \rightarrow -\infty$ .

*Proof.* Making the Briot-Bouquet transformation

$$x = x, y = zx, ds = xdt,$$

we transform system **A2** into the following system:

$$\begin{cases} \frac{dx}{ds} = \beta_- x + (\beta_+ - \beta_-)xz - \frac{x^2}{\kappa_F}, \\ \frac{dz}{ds} = \sigma z - (\gamma + \sigma)z^2. \end{cases} \quad [\mathbf{A4}]$$

The Briot-Bouquet transformation maps the first, second, third, and fourth quadrants in the  $(x, y)$  plane into the first, third, second, and fourth quadrants in the  $(x, z)$  plane, respectively. The inverse Briot-Bouquet transformation maps the  $z$  axis in the  $(x, z)$  plane to the point  $(0,0)$  in the  $(x, y)$  plane, and maps the orbits in the left of the  $z$  axis in the  $(x, z)$  plane to orbits in the left of the  $y$  axis in the  $(x, y)$  plane with reversed directions. Thus, we consider only equilibria of system **A4** in the  $z$  axis. There are two equilibria:  $(0,0)$  and  $(0, \sigma/(\gamma + \sigma))$ . Linear analysis shows that  $(0,0)$  is an unstable node, and  $(0, \sigma/(\gamma + \sigma))$  is an unstable saddle. Thus, there is a unique separatrix in the interior of the first quadrant of system **A4**, which tends to  $(0, \sigma/(\gamma + \sigma))$  as  $t \rightarrow -\infty$ .

By the inverse Briot-Bouquet transformation, there exist  $\varepsilon_1 > 0$  and  $r_1 > 0$ , such that there is a unique orbit of system **A2** in  $\{(r, \theta) : 0 < r < r_1, 0 \leq \theta - \theta_3 < \varepsilon_1\}$  that tends to  $(0,0)$  along  $\theta = \theta_3$  as  $t \rightarrow -\infty$ .

**Proposition A4.** System **A2** does not have limit cycles.

*Proof.* Denote the functions on the right-hand side in system **A2** by  $f(x, y)$  and  $g(x, y)$ .

Choose a Dulac function  $D(x, y) = \frac{1}{xy}$  and notice that  $x, y > 0$ . We have

$$\frac{\partial(D(x, y)f(x, y))}{\partial y} + \frac{\partial(D(x, y)g(x, y))}{\partial x} = -\left(\frac{\beta_- x}{y^2} + \frac{x^2}{K_F y^2} + \frac{\tau y}{x^2} + \frac{1}{K_F}\right) < 0.$$

This implies that system **A2** does not have a limit cycle.

Combining Propositions **A1-A4** and using Poincaré-Bendixson's Theorem [see Perko (2)], we have the following theorem about the dynamical behavior of solutions to systems **A1** and thus system **2**.

**Theorem A5.** *For the original system 2, the topological structure of the trivial equilibrium  $E_0$  in the interior of the first quadrant consists of a parabolic sector and a hyperbolic sector; the semitrivial equilibrium  $E_F$  is stable if  $\sigma < 0$  and unstable if  $\sigma > 0$ ; the positive equilibrium  $E^*$  is a global attractor if  $\sigma > 0$ .*

## **B. Steady States for System 3**

To find the steady states of system **3**, consider

$$\lambda - \nu \bar{S} - \eta \left[ \Phi_{V_F}(\bar{i}_N) + \Phi_{V^-}(\bar{i}_R) + \Phi_{V^+}(\bar{i}_R) \right] \bar{S} = 0,$$

$$\frac{d}{da} \bar{i}_N(a) = -\mu_N(a) \bar{i}_N(a), \quad [\mathbf{B1}]$$

$$\frac{d}{da} \bar{i}_R(a) = -\mu_R(a) \bar{i}_R(a).$$

From the first equation in **B1**, we have

$$\bar{S} = \frac{\lambda}{\nu + \eta \bar{\Phi}}, \quad \bar{\Phi} = \left[ \Phi_{V_F}(\bar{i}_N) + \Phi_{V^-}(\bar{i}_R) + \Phi_{V^+}(\bar{i}_R) \right]. \quad [\mathbf{B2}]$$

From the second and third equations in **B1**, we have

$$\bar{i}_N(a) = \exp \left[ - \int_0^a \mu_N(\hat{a}) d\hat{a} \right] \bar{i}_N(0) = \exp \left[ - \int_0^a \mu_N(\hat{a}) d\hat{a} \right] \eta \left[ \Phi_{V_F}(\bar{i}_N) + \Phi_{V^-}(\bar{i}_R) \right]$$

$$\bar{i}_R(a) = \exp \left[ - \int_0^a \mu_R(\hat{a}) d\hat{a} \right] \bar{i}_R(0) = \exp \left[ - \int_0^a \mu_R(\hat{a}) d\hat{a} \right] \eta \left[ \Phi_{V^+}(\bar{i}_R) \right]$$

Using the definitions of  $T_F, T_{V^-}$  and  $T_{V^+}$ , we have

$$\bar{i}_N(0) = \eta \left[ \int_0^{\infty} (V_F(a) \bar{i}_N(0) + V^-(a) \bar{i}_R(0)) da \right] \exp \left[ - \int_0^{\infty} \mu_N(\hat{a}) d\hat{a} \right] \bar{S}$$

$$= \eta \left[ \bar{i}_N(0) T_F + \bar{i}_R(0) T_{V^-} \right] \bar{S} \quad [\mathbf{B3}]$$

and

$$\bar{i}_R(0) = \eta \left[ \int_0^{\infty} V^+(a) \bar{i}_R(0) da \right] \exp \left[ - \int_0^{\infty} \mu_R(\hat{a}) d\hat{a} \right] \bar{S} = \eta \left[ \bar{i}_R(0) T_{V^+} \right] \bar{S} \quad [\mathbf{B4}]$$

From **B2**, we have  $\bar{\Phi} = (\lambda - \nu \bar{S}) / (\eta \bar{S})$ . **B3** and **B4** imply that  $\bar{i}_N(0) + \bar{i}_R(0) = \eta \bar{\Phi} \bar{S}$ . We then have the following claim:

**Claim B1.** If  $\bar{i}_N(0) + \bar{i}_R(0) \neq 0$ , then  $\bar{i}_N(0) + \bar{i}_R(0) = \lambda - \mu\bar{S}$ .

Now **B4** implies that

$$\bar{S} = \frac{1}{\eta T_{V^+}} \text{ if } \bar{i}_R(0) \neq 0. \quad [\mathbf{B5}]$$

Substituting **B5** into **B3**, we have  $\bar{i}_N(0) = \left[ \bar{i}_N(0)T_F + \bar{i}_R(0)T_{V^-} \right] / T_{V^+}$ , which implies that

$$\frac{\bar{i}_R(0)}{\bar{i}_N(0)} = \frac{T_{V^+} - T_F}{T_{V^-}} \text{ if } \bar{i}_N(0) \neq 0. \quad [\mathbf{B6}]$$

We now prove the second claim.

**Claim B2.** A necessary condition for  $\bar{i}_N(0) > 0$  is  $T_{V^+} > T_F$ .

Because

$$\bar{i}_N(0) = \bar{i}_R(0) \left( \frac{T_{V^-}}{T_{V^+} - T_F} \right) = (\lambda - \nu\bar{S} - \bar{i}_N(0)) \left( \frac{T_{V^-}}{T_{V^+} - T_F} \right),$$

we have

$$\bar{i}_N(0) = \left( \lambda - \frac{\nu}{\eta T_F} \right) \left( \frac{T_{V^-}}{T_{V^+} + T_{V^-} - T_F} \right), \quad [\mathbf{B7}]$$

and



$$\bar{i}_R(0) = \left( \lambda - \frac{\nu}{\eta T_F} \right) \left( \frac{T_{V^+} - T_F}{T_{V^+} + T_{V^-} - T_F} \right). \quad [\mathbf{B8}]$$

**Claim B3.** A necessary condition for  $\bar{i}_N(0) > 0$  and  $\bar{i}_R(0) > 0$  is  $\lambda > \nu/(\eta T_F)$ .

For the existence of steady states, we have three cases.

(a) If  $R_0 = (\lambda\eta/\nu) \max(T_F, T_{V^+}) < 1$ , then  $\bar{i}_N(0) = 0$ . **B3** thus implies  $\bar{i}_R(0) = 0$ . The equilibrium is given by

$$\bar{S} = \lambda / \mu, \bar{I}_N = 0, \bar{I}_R = 0.$$

(b) If  $R_0 = (\lambda\eta/\nu) \max(T_F, T_{V^+}) = (\lambda\eta/\nu) T_F > 1$ , then  $\bar{i}_N(0) > 0$  and  $\bar{i}_R(0) = 0$ . **B3** and **B4** give the steady-state values

$$\bar{S} = 1/(\eta T_{V^+}), \bar{I}_N = \left( \lambda - \frac{\nu}{\eta T_F} \right) \exp \left[ - \int_0^{\infty} \mu_N(\hat{a}) d\hat{a} \right], \bar{I}_R = 0.$$

(c) If  $(R_0 = (\lambda\eta/\nu) \max(T_F, T_{V^+}) = (\lambda\eta/\nu) T_{V^+} > 1$ , then  $\bar{i}_N(0) > 0$  and  $\bar{i}_R(0) > 0$ . **B5**, **B7**, and **B8** yield the following steady-state values:

$$\bar{S} = 1/(\eta T_{V^+}), \bar{I}_N = \left( \lambda - \frac{\nu}{\eta T_F} \right) \left( \frac{T_{V^-}}{T_{V^+} + T_{V^-} - T_F} \right) \exp \left[ - \int_0^{\infty} \mu_N(\hat{a}) d\hat{a} \right],$$

$$\bar{I}_R = \left( \lambda - \frac{\nu}{\eta T_F} \right) \left( \frac{T_{V^+} - T_F}{T_{V^+} + T_{V^-} - T_F} \right) \exp \left[ - \int_0^{\infty} \mu_R(\hat{a}) d\hat{a} \right].$$

1. Zhang, Z., Ding, T., Huang, W. & Dong, Z. (1991) *Qualitative Theory of Differential Equations* (Transl. Math. Monogr. 101, Am. Math. Soc., Providence, RI).

2. Perko, L. (1996) *Differential Equations and Dynamical Systems* (Springer, New York).
